# Supplementary material for: Coarse‐graining bacteria colonies for modelling critical solute distributions in picolitre bioreactors for bacterial studies on single‐cell level
Source: PubMed Central journal article supplement (PMC5481542; doi:10.1111/1751-7915.12708), 2017-04-03
Supplement: MBT2-10-845-s001.pdf [file MBT2-10-845-s001.pdf]

# Supplementary Information

**Coarse graining bacteria colonies for modeling critical solute distributions in picoliter bioreactors for bacterial studies on single-cell level**

Christoph Westerwalbesloh, Alexander Grünberger,  
Wolfgang Wiechert, Dietrich Kohlheyer and Eric von Lieres\*

January 23, 2017

Institute of Bio- and Geosciences, IBG-1: Biotechnology,  
Forschungszentrum Jülich, Jülich 52425 Germany;  
telephone: +49-2461-61-2168; fax: +49-2461-61-3870; e-mail:  
e.von.lieres@fz-juelich.de

Table 1: Number of mesh elements

| Model    | 2 Cells              | 20 Cells             | 50 Cells             | 100 Cells            | 200 Cells            |
|----------|----------------------|----------------------|----------------------|----------------------|----------------------|
| Model 1a | $1.3619 \times 10^6$ | $1.3619 \times 10^6$ | $1.3619 \times 10^6$ | $1.3619 \times 10^6$ | $1.3619 \times 10^6$ |
| Model 1b | $1.3619 \times 10^6$ | $1.3620 \times 10^6$ | $1.3612 \times 10^6$ | $1.3615 \times 10^6$ | $1.3616 \times 10^6$ |
| Model 2a | $1.3633 \times 10^6$ | $1.3635 \times 10^6$ | $1.3630 \times 10^6$ | $1.3643 \times 10^6$ | $1.3633 \times 10^6$ |
| Model 2b | $1.3635 \times 10^6$ | $1.3636 \times 10^6$ | $1.3635 \times 10^6$ | $1.3650 \times 10^6$ | $1.3642 \times 10^6$ |
| Model 3a | $1.5721 \times 10^6$ | $2.9147 \times 10^6$ | $4.3734 \times 10^6$ | $6.8687 \times 10^6$ | $4.7444 \times 10^6$ |
| Model 3b | $1.5817 \times 10^6$ | $1.7546 \times 10^6$ | $4.4118 \times 10^6$ | $3.1349 \times 10^6$ | $6.4294 \times 10^6$ |

Table 2: Mesh independence for geometry with 100 cells

| Model    | Elements             |                         | Maximum concentration difference<br>in xy-plane at half-chamber height |
|----------|----------------------|-------------------------|------------------------------------------------------------------------|
|          | Normal mesh          | Refined mesh            |                                                                        |
| Model 1a | $1.3619 \times 10^6$ | $6.050076 \times 10^6$  | $4.9 \times 10^{-2}$ mmol/L                                            |
| Model 1b | $1.3615 \times 10^6$ | $6.052157 \times 10^6$  | $2.1 \times 10^{-3}$ mmol/L                                            |
| Model 2a | $1.3643 \times 10^6$ | $6.079938 \times 10^6$  | $3.5 \times 10^{-3}$ mmol/L                                            |
| Model 2b | $1.3650 \times 10^6$ | $6.079938 \times 10^6$  | $3.6 \times 10^{-3}$ mmol/L                                            |
| Model 3a | $6.8687 \times 10^6$ | $26.281688 \times 10^6$ | $2.7 \times 10^{-3}$ mmol/L                                            |
| Model 3b | $3.1349 \times 10^6$ | $13.547256 \times 10^6$ | $5.5 \times 10^{-3}$ mmol/L                                            |

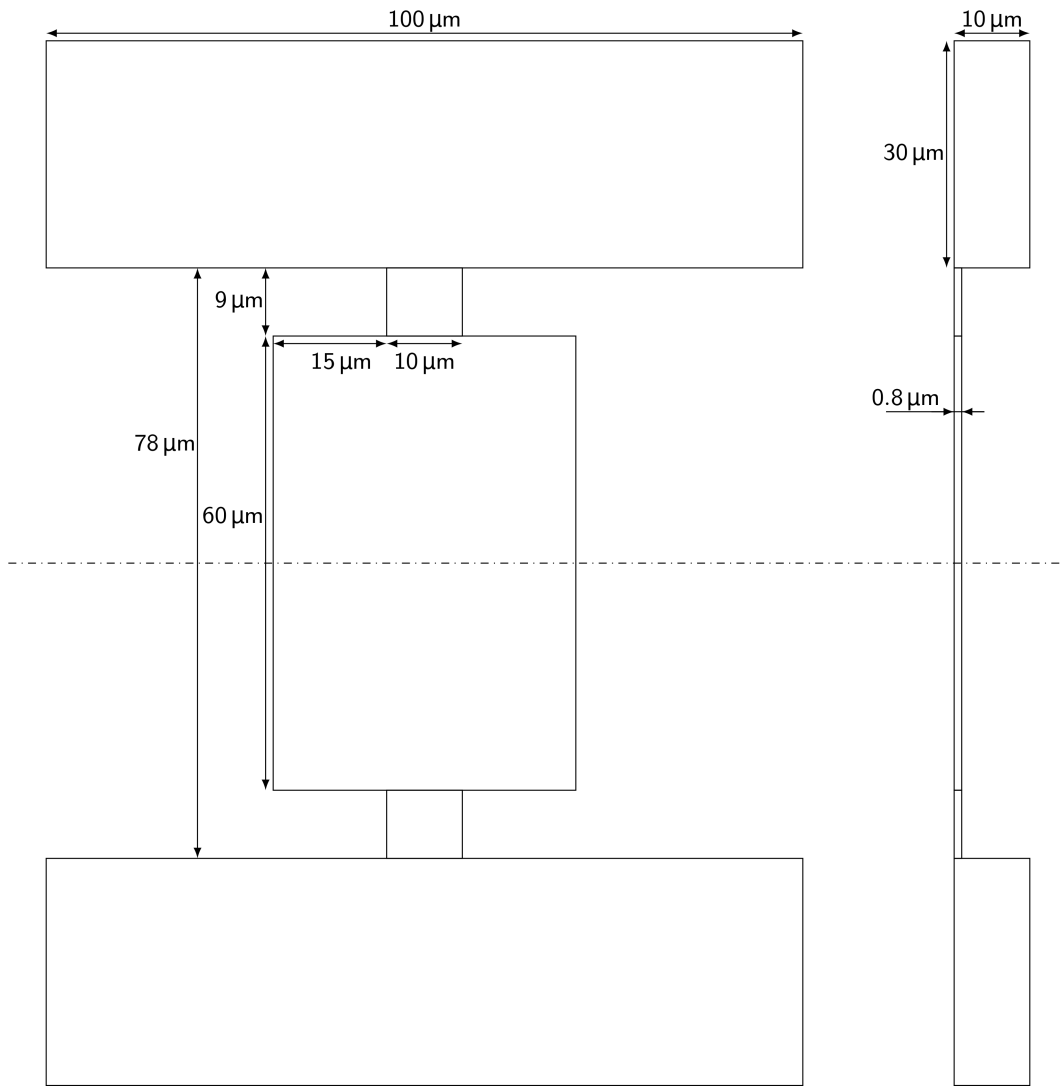

Figure 1: Measurements of the simulated chamber geometry with supply channels.

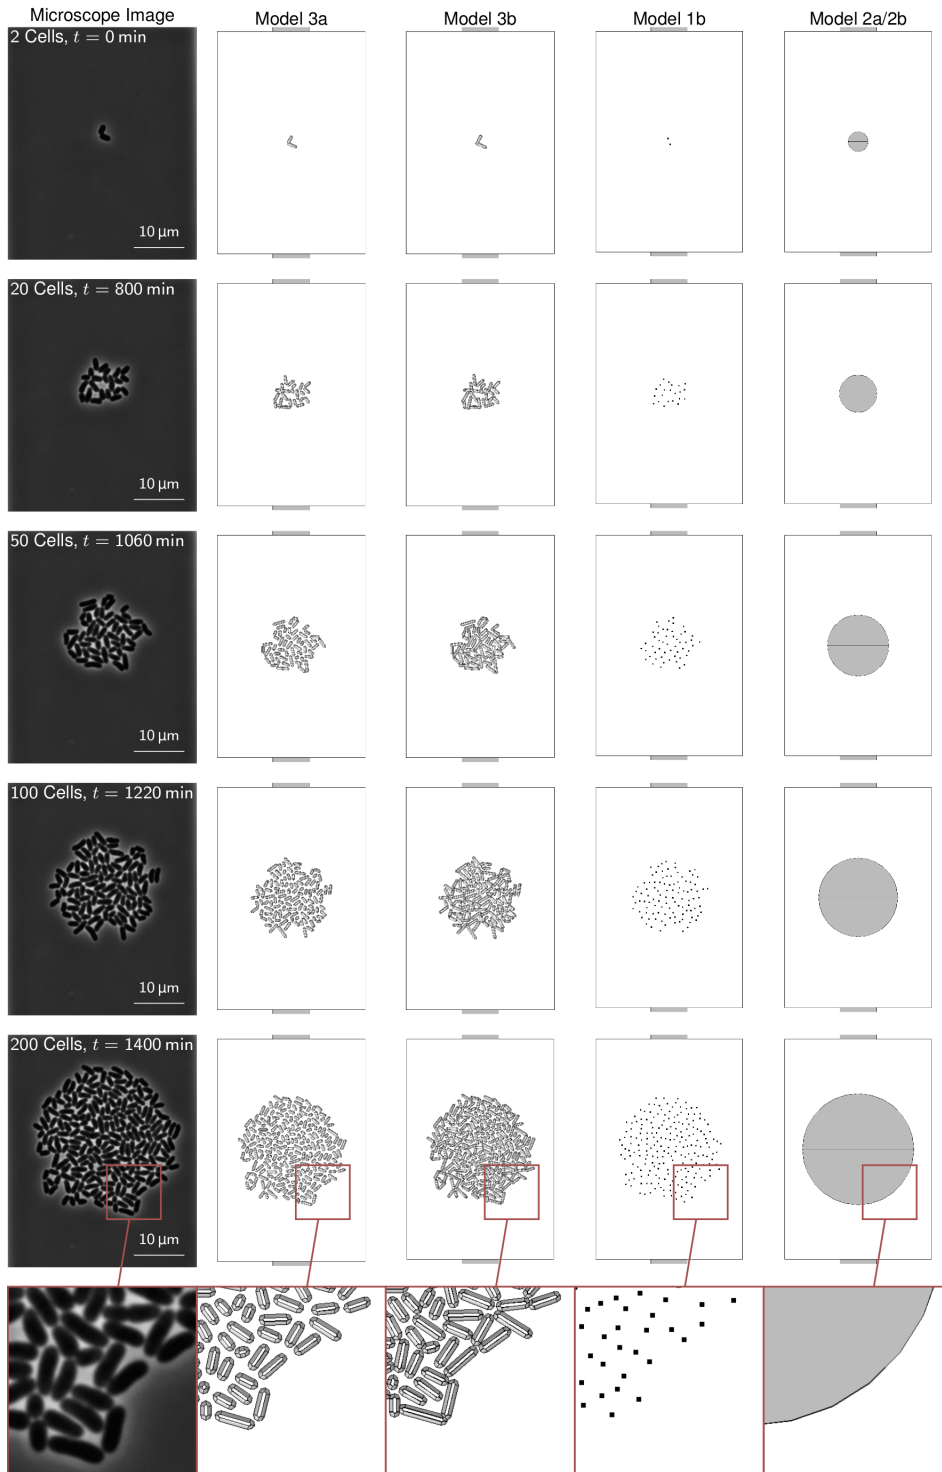

Figure 2: Different model geometries in comparison to the respective microscope images. Model 1a is not shown.

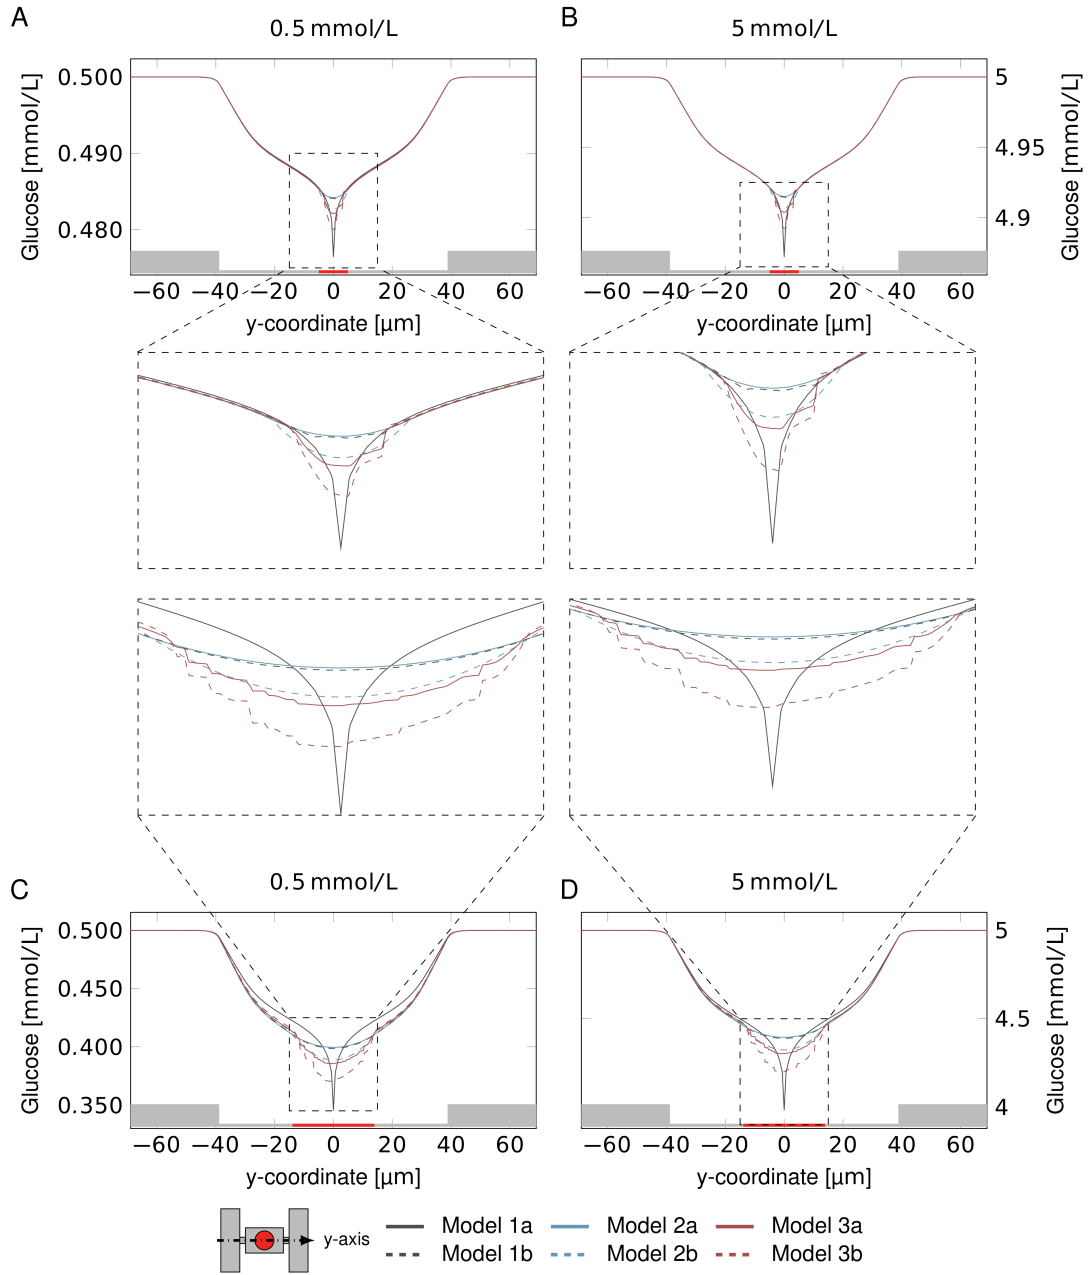

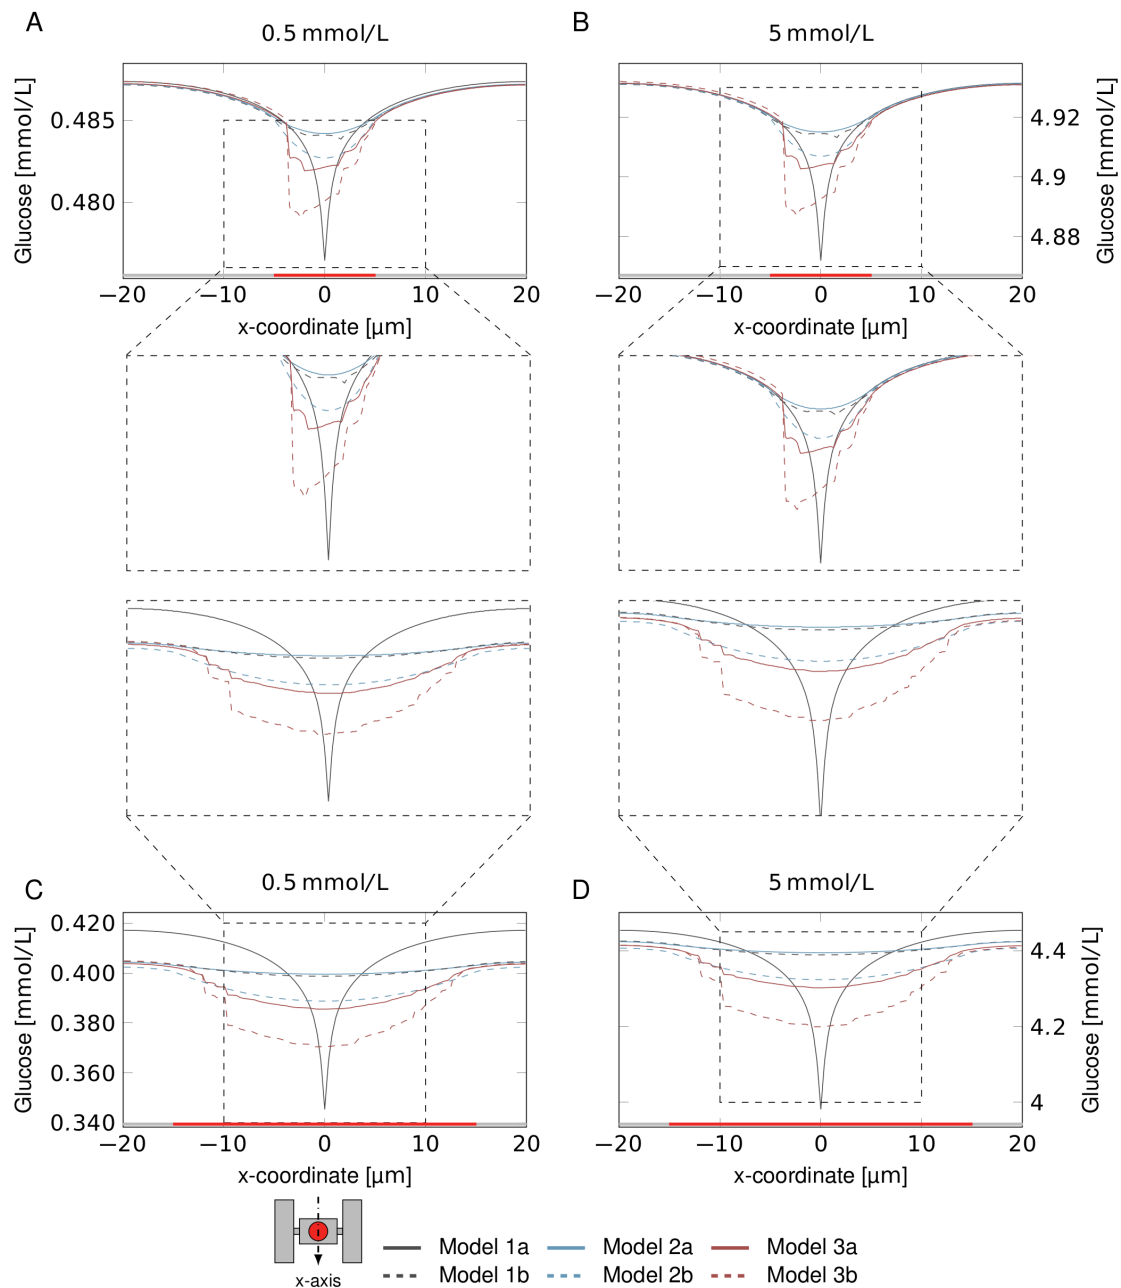

Figure 4: Nutrient distribution within microcolonies based on simulations with different coarse graining concepts. The graphs and respective zoom-outs show the glucose concentration along the x-axis through the center of the chamber/colony in mmol/L for the colony with 20 cells (A, B) and 200 cells (C, D) and two medium glucose concentrations of 0.5 mmol/L (A,C) and 5 mmol/L (B,D).

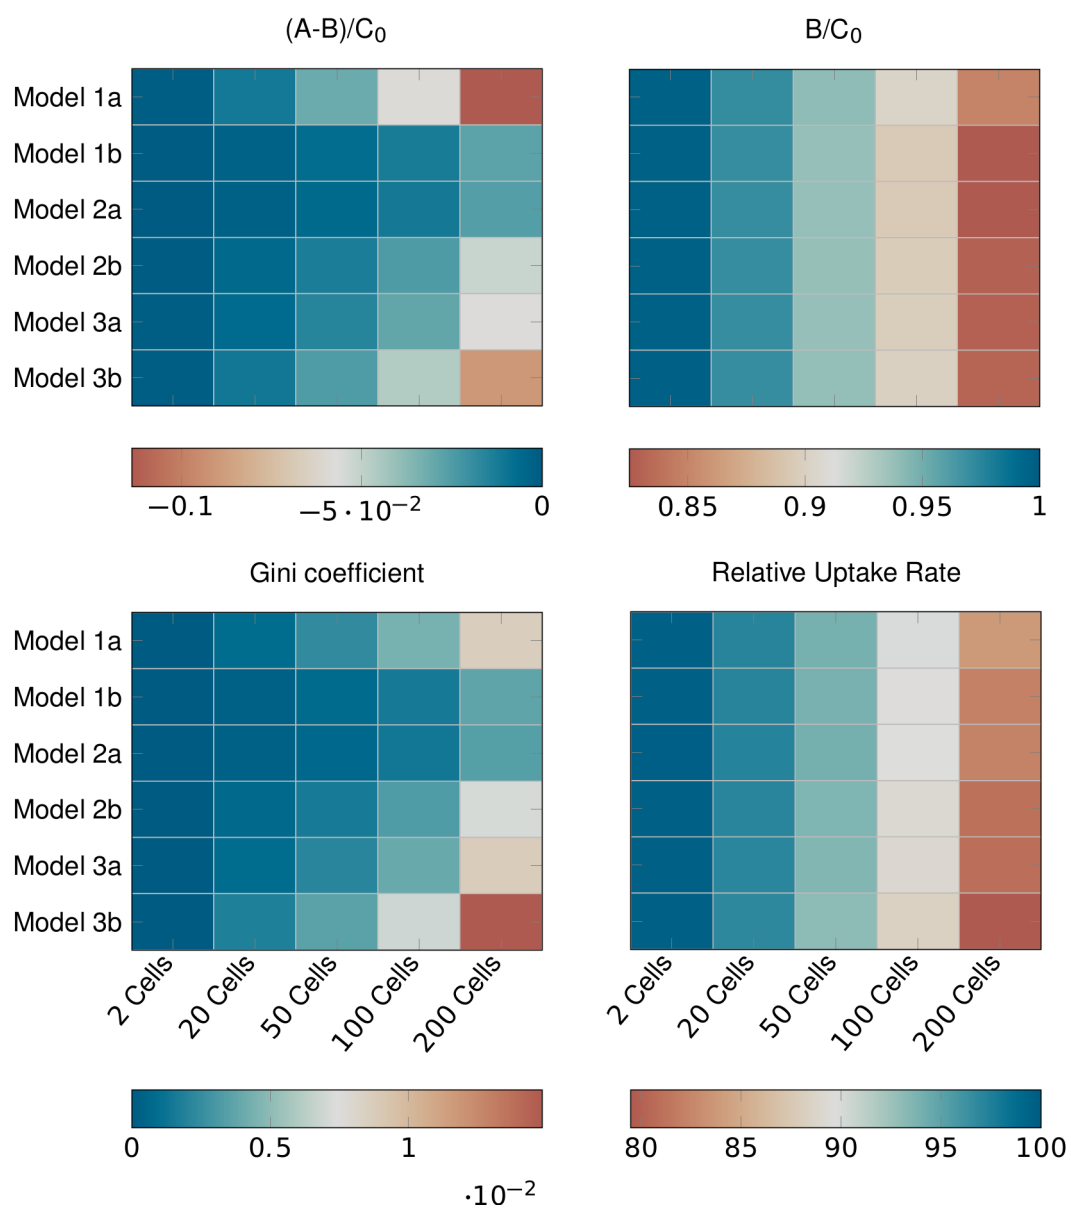

Figure 5: The concentrations B and A – B normalized to C, the Gini coefficient and the average relative uptake rate for each model and colony size and the nutrient concentration of 0.5 mmol/L.

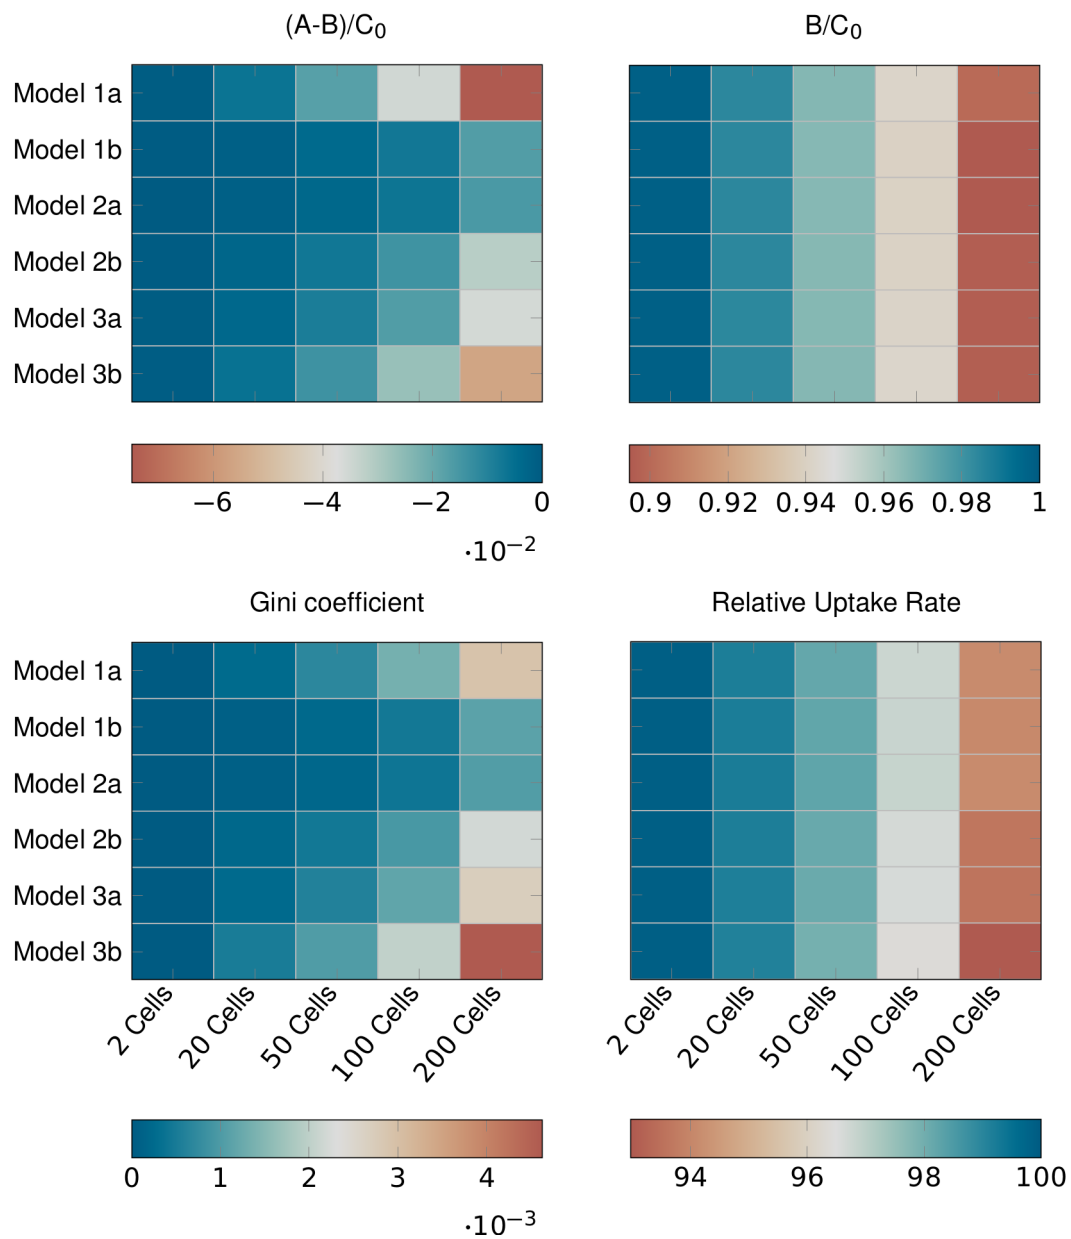

Figure 6: The concentrations B and A – B normalized to C, the Gini coefficient and the average relative uptake rate for each model and colony size and the nutrient concentration of 5 mmol/L.



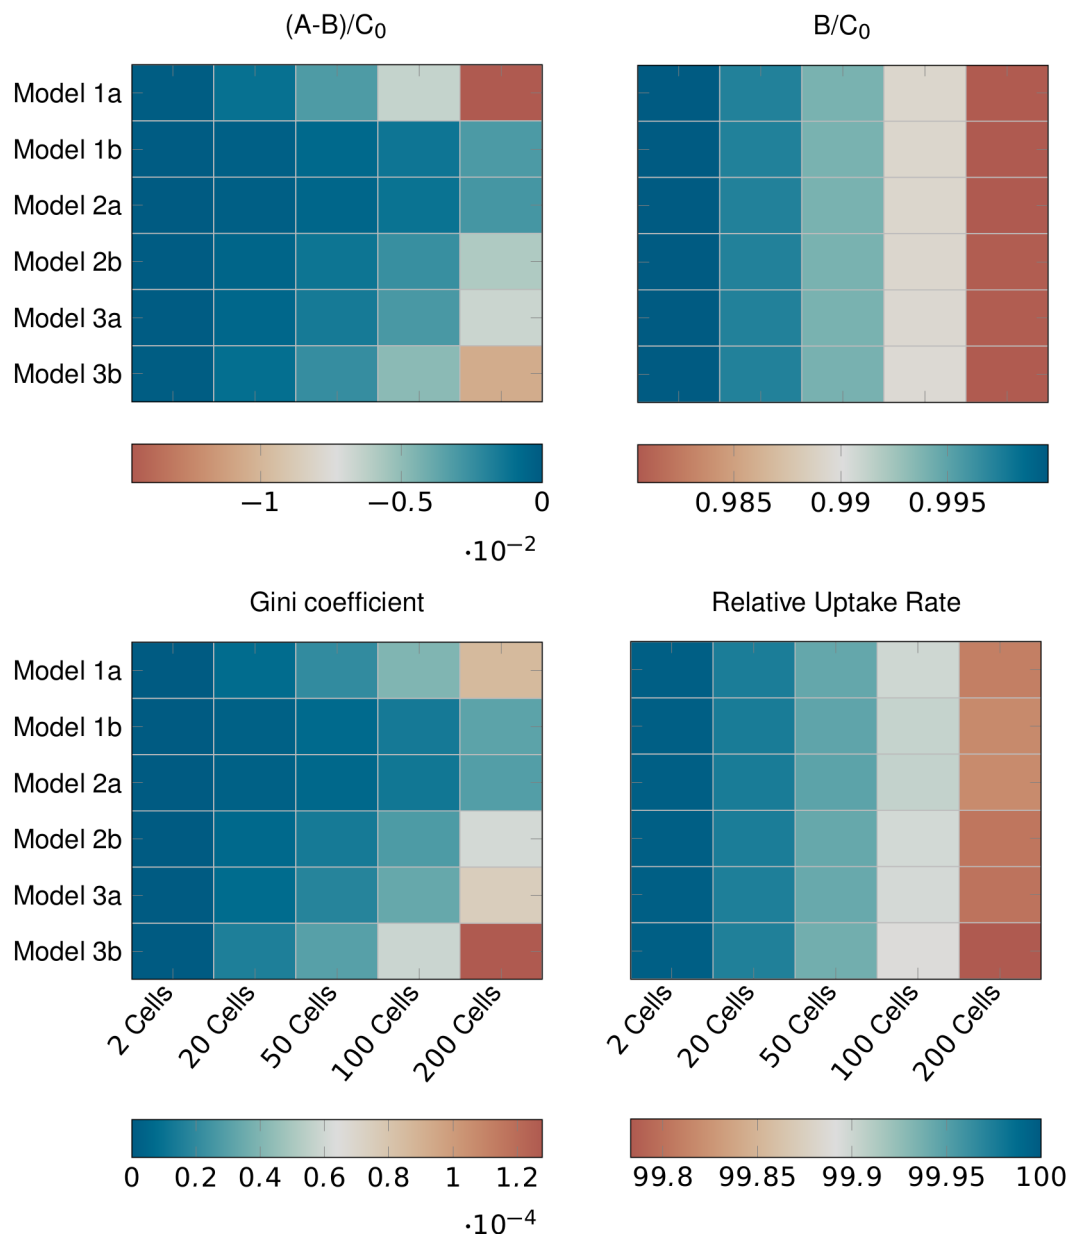

Figure 7: The concentrations B and A – B normalized to C, the Gini coefficient and the average relative uptake rate for each model and colony size and the nutrient concentration of 50 mmol/L.
